# Supplementary material for: A New Generation of Ultrasmall Nanoparticles Inducing Sensitization to Irradiation and Copper Depletion to Overcome Radioresistant and Invasive Cancers
Source: MDPI journal article supplement (doi:10.3390/pharmaceutics14040814), 2022-04-07
Supplement: s1 [file s1]

# Supplementary Materials: A New Generation of Ultrasmall Nanoparticles Inducing Sensitization to Irradiation and Copper Depletion to Overcome Radioresistant and Invasive Cancers

Paul Rocchi, Delphine Brichart-Vernos, François Lux, Isabelle Morfin, Laurent David, Claire Rodriguez-Lafrasse, Olivier Tillement

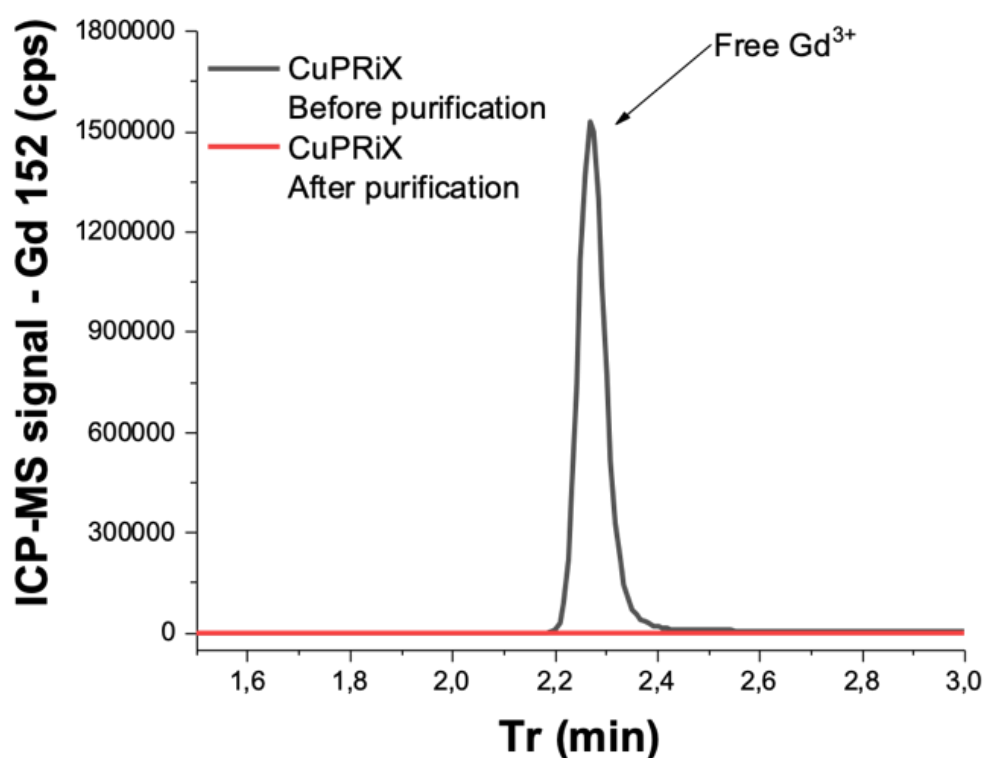

**Figure S1.** Comparison of free Gd<sup>3+</sup> ions level before and after purification followed by HPLC-ICP/MS.

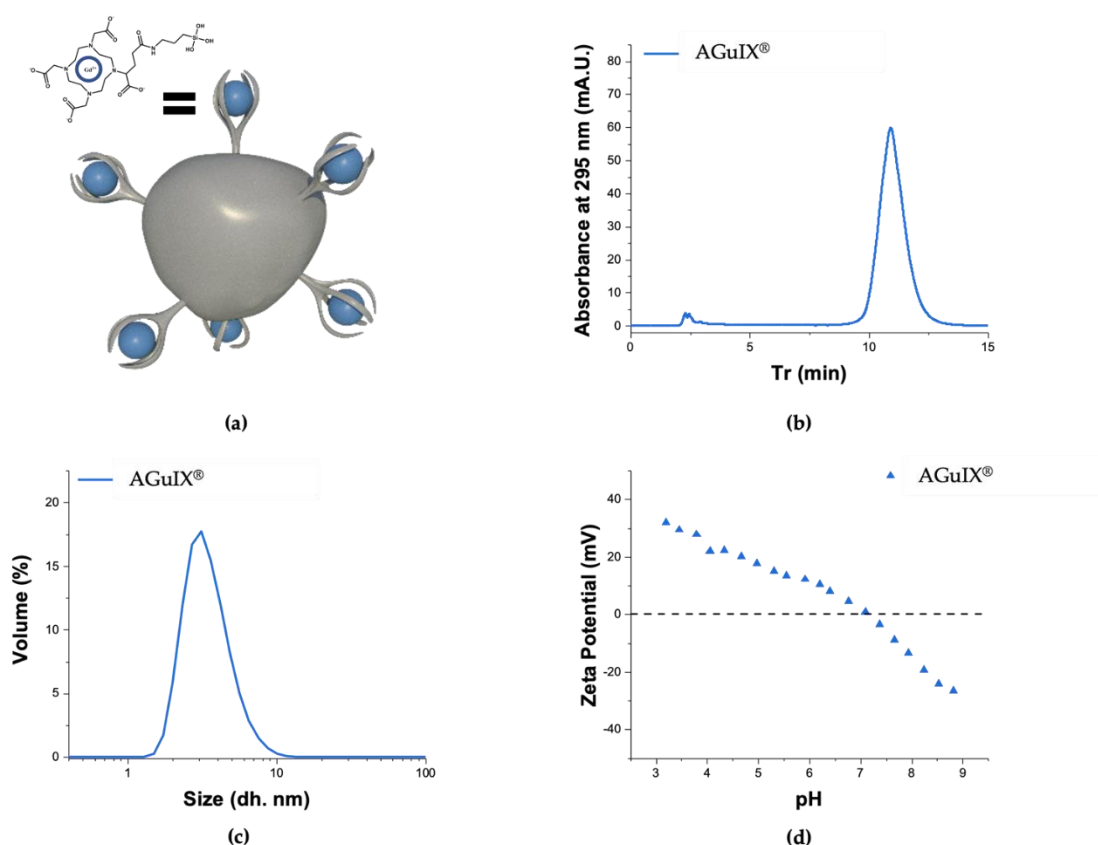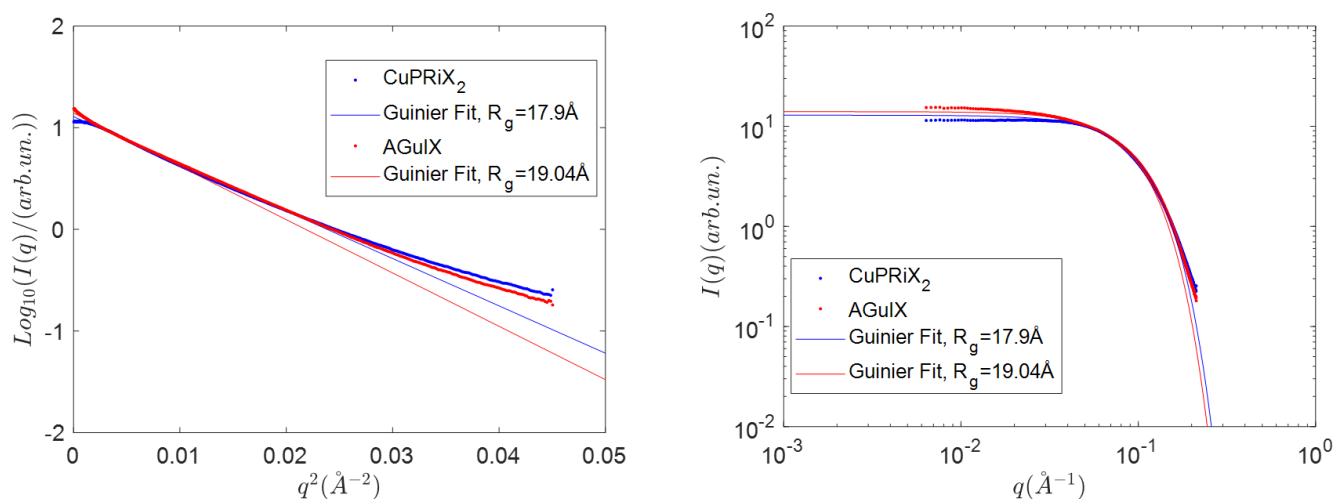

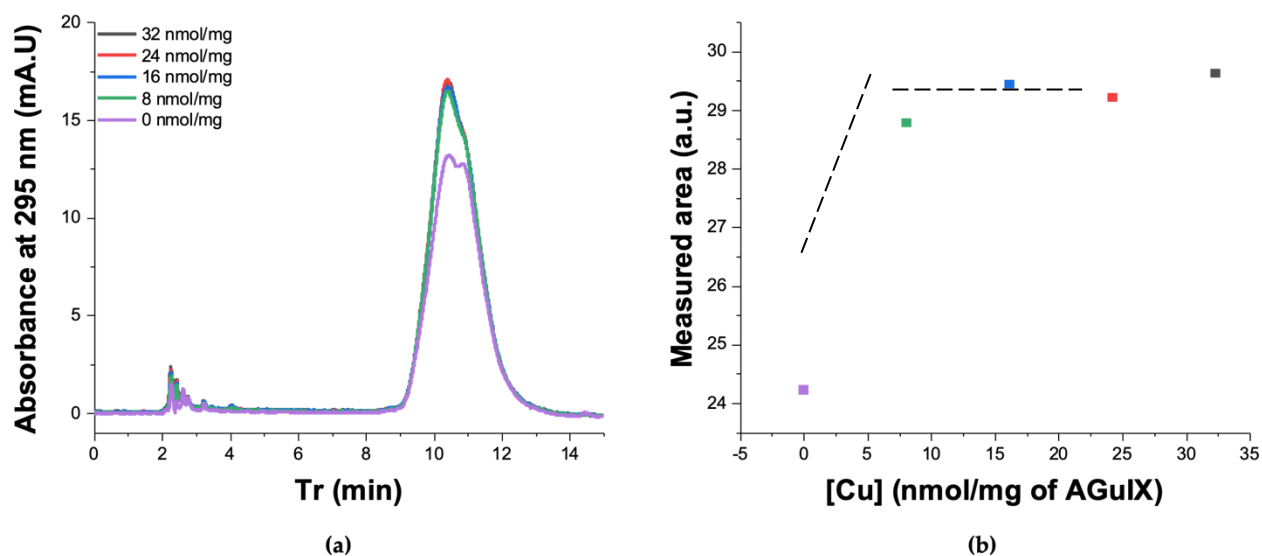

**Figure S4. Measurement of unchelated DOTAGA on AGuIX®.** (a) Chromatograms of samples with increasing amount of  $\text{Cu}^{2+}$  per mg of AGuIX®. The increase in absorbance at 295 nm is due to the formation of DOTAGA@( $\text{Cu}^{2+}$ ); (b) Measured area depending on the amount of  $\text{Cu}^{2+}$ . The onset of the absorbance plateau shows the amount of DOTAGA on AGuIX®.

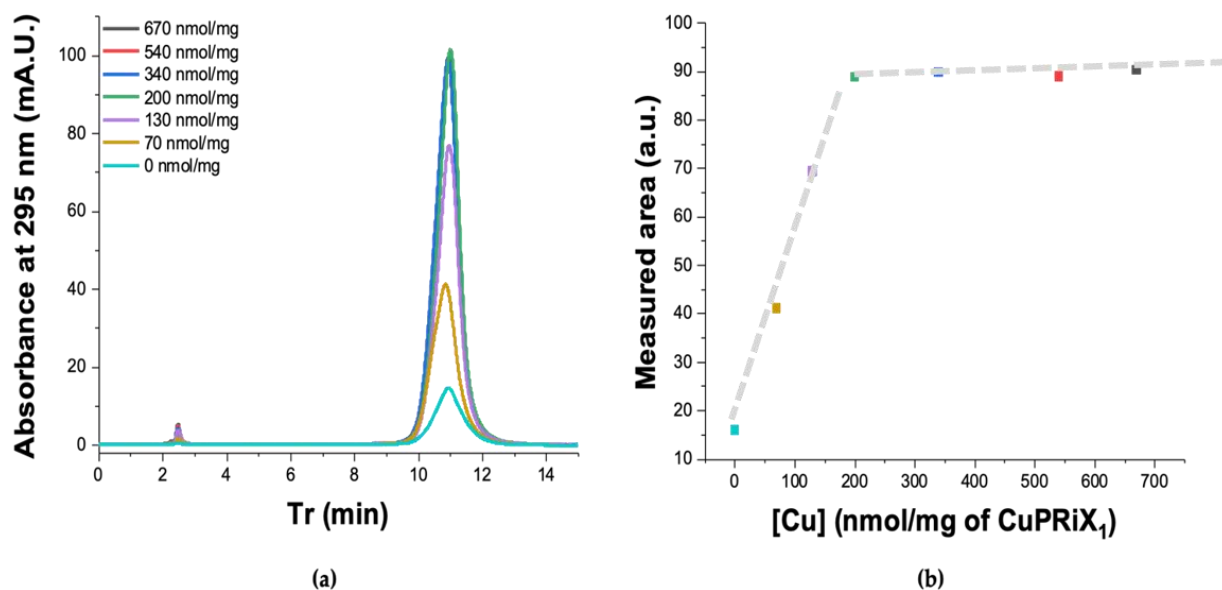

**Figure S5. Measurement of unchelated DOTAGA on CuPRiX<sub>1</sub>.** (a) Chromatograms of samples with increasing amount of  $\text{Cu}^{2+}$  per mg of CuPRiX<sub>1</sub>. The increase in absorbance at 295 nm is due to the formation of DOTAGA@( $\text{Cu}^{2+}$ ); (b) Measured area depending on the amount of  $\text{Cu}^{2+}$ . The slope change shows the amount of DOTAGA on CuPRiX<sub>1</sub>.

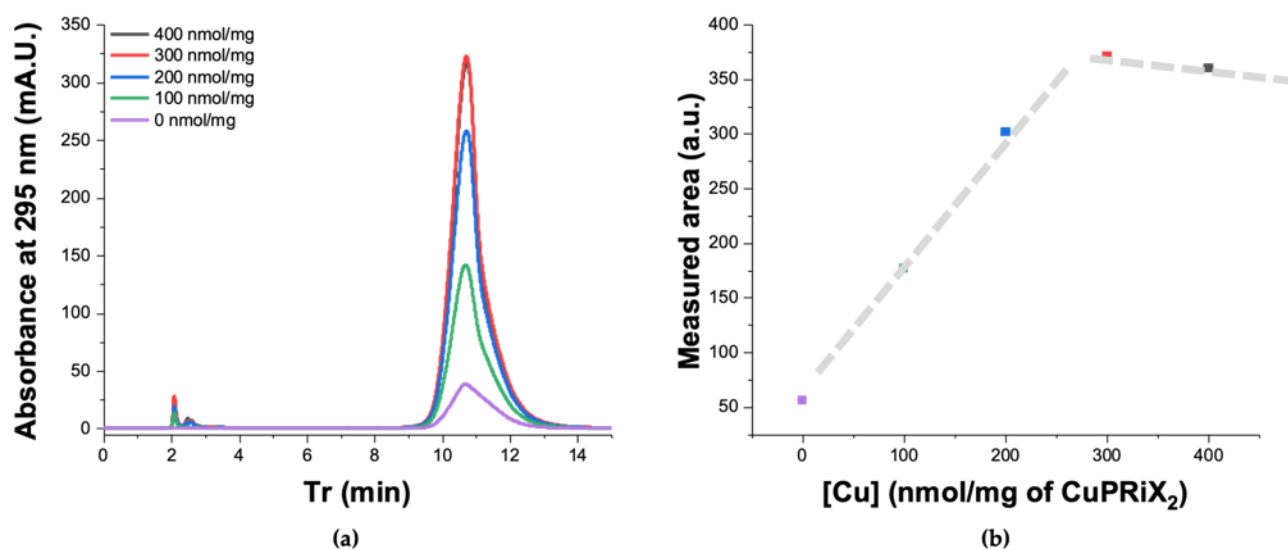

**Figure S6. Measurement of unchelated DOTAGA on  $\text{CuPRiX}_2$ .** (a) Chromatograms of samples with increasing amount of  $\text{Cu}^{2+}$  per mg of  $\text{CuPRiX}_2$ . The increase in absorbance at 295 nm is due to the formation of  $\text{DOTAGA}@\text{Cu}^{2+}$ ; (b) Measured area depending on the amount of  $\text{Cu}^{2+}$ . The slope change shows the amount of DOTAGA on  $\text{CuPRiX}_2$ .

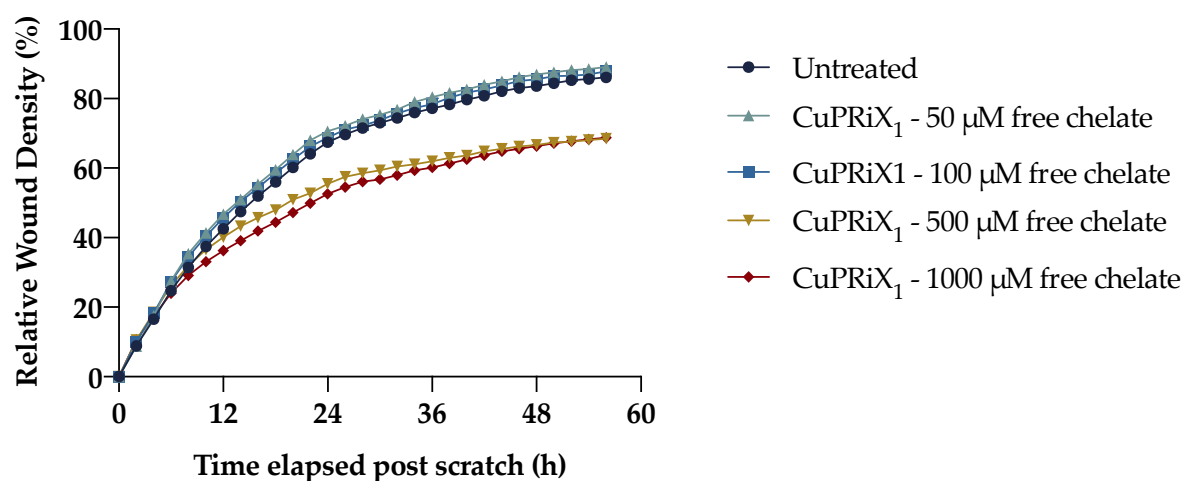

**Figure S7. Effect of increasing concentrations of  $\text{CuPRiX}_1$  (0, 50, 100, 500, 1000  $\mu\text{M}$  of uncomplexed chelate) on cell motility of A549 cells. Quantitative analysis of wound closure as a function of time. Relative wound density is a measure of the density of the wound region relative to the density of the cell region (%). Data are presented as the mean  $\pm$  SEM (n=6).**

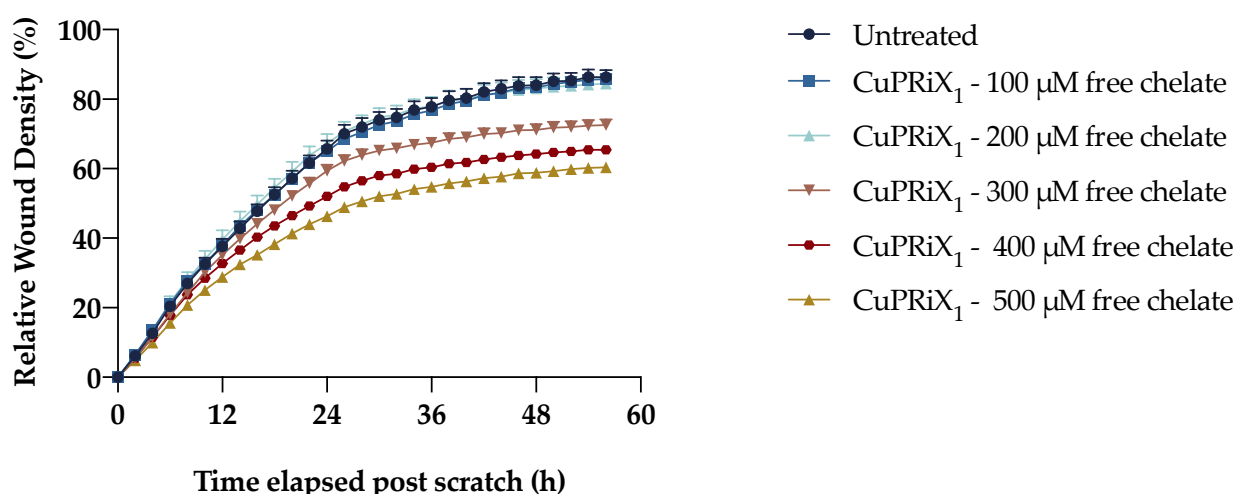

**Figure S8.** Effect of increasing concentrations of CuPRiX<sub>1</sub> (0, 100, 200, 300, 400, and 500  $\mu$ M of uncomplexed chelate) on cell motility of A549 cells. Quantitative analysis of wound closure as a function of time. Relative wound density is a measure of the density of the wound region relative to the density of the cell region (%). Data are presented as the mean  $\pm$  SEM (n=6).

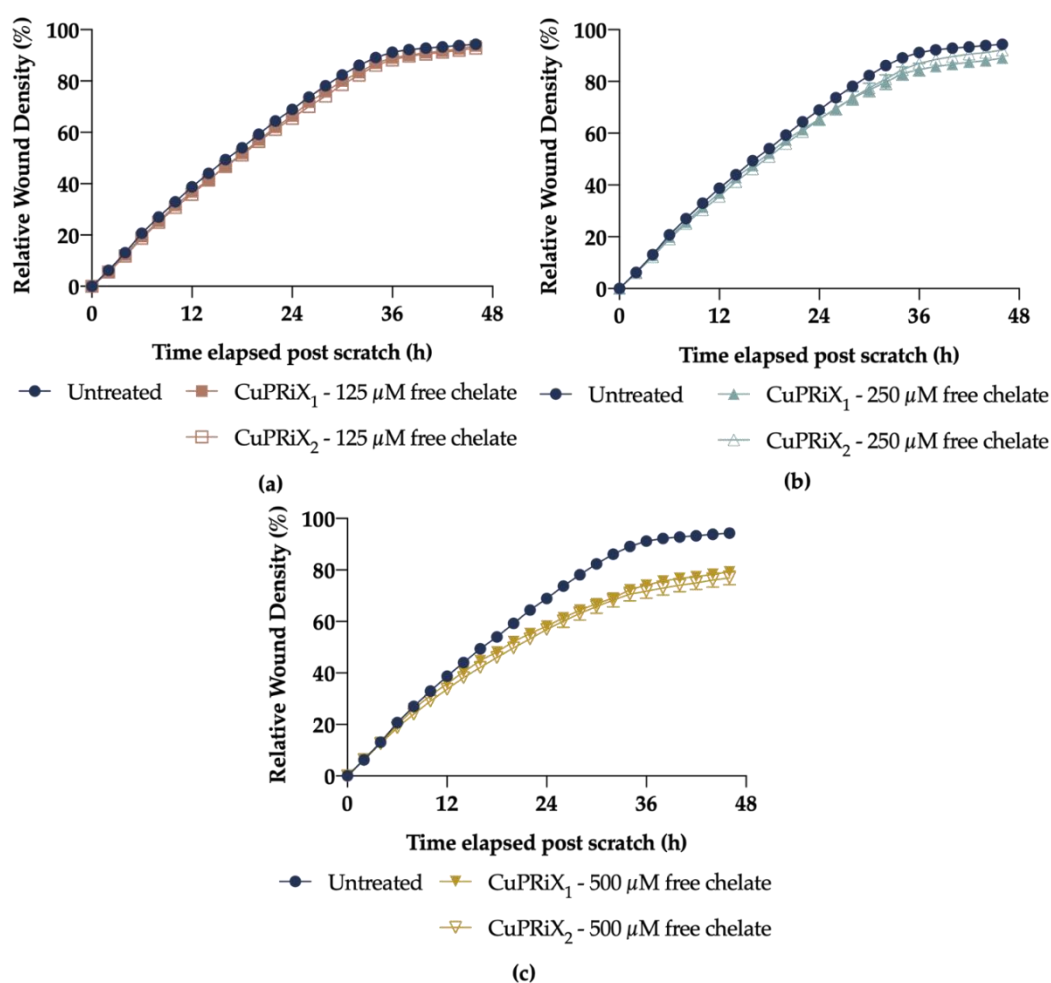

**Figure S9.** Effect of CuPRiX<sub>1</sub> and CuPRiX<sub>2</sub> on cell motility of A549 cells. (a) Treatment with 125  $\mu$ M of uncomplexed chelate. (b) Treatment with 250  $\mu$ M of uncomplexed chelate. (c) Treatment with 500  $\mu$ M of uncomplexed chelate. Relative wound density is a measure of the density of the wound region relative to the density of the cell region (%). Data are presented as the mean  $\pm$  SEM (n=6).

### Proliferation Assay

A549 and SQ20B-CSCs cells were seeded in a 96-well plate at a density of 5,000 cells/well and incubated overnight at 37°C, 5% CO<sub>2</sub> to allow adhesion. Medium was removed and replaced with medium alone or containing CuPRiX<sub>1</sub> (500 µM of uncomplexed DOTAGA). The plates were placed in the IncuCyte ZOOM device and pictures were taken every 4 h for 48 h. Data were analyzed with the IncuCyte ZOOM software (v. 2018A), which allows quantification of cell surface coverage as confluence values.

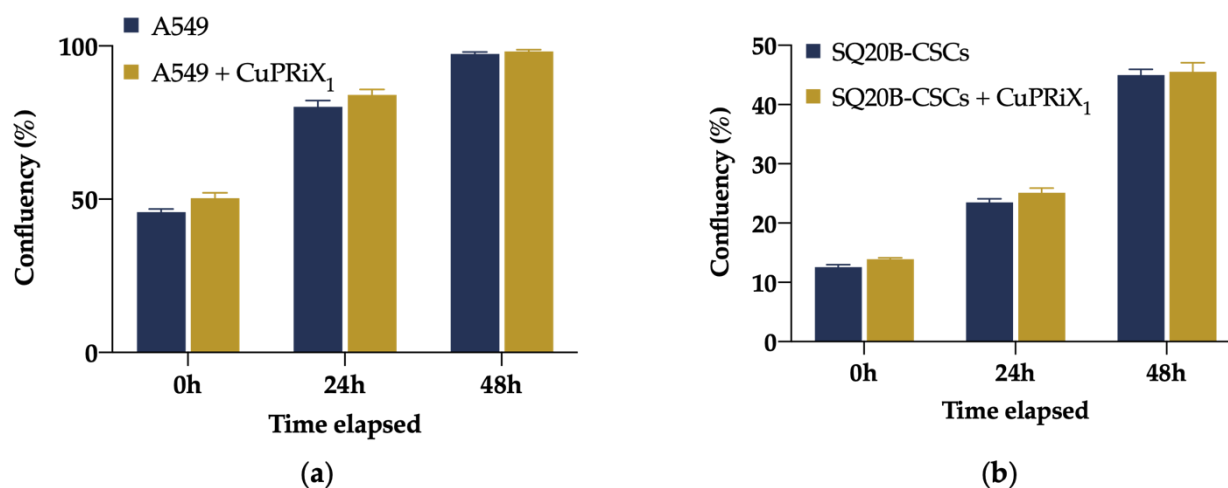

Figure S10. Proliferation of A549 (a) and SQ20B-CSCs (b) cells after treatment with CuPRiX<sub>1</sub> (500 µM of free DOTAGA). Cell proliferation was monitored with using IncuCyte ZOOM device, photos of the wells were taken every 6 hours for 48 h, and the percentage of cell confluency was expressed.
